# Supplementary material for: Curcumin prevents and reverses murine cardiac hypertrophy
Source: JCI journal article supplement (doi:10.1172/jci32865), 2008-02-01
Supplement: sd1 [file 1]

## Li et al., Supplemental Table. 1

The dose-dependent effects of curcumin on cardiac hypertrophy induced by aortic banding model.

| Curcumin (mg) | Sham      |           |           |           | AB 3 week              |                        |                        |                        |
|---------------|-----------|-----------|-----------|-----------|------------------------|------------------------|------------------------|------------------------|
|               | Vehicle   | 50        | 75        | 100       | Vehicle                | 50                     | 75                     | 100                    |
| Number        | n=12      | n=10      | n=8       | n=8       | n=12                   | n=11                   | n=7                    | n=8                    |
| BW (g)        | 27.4±1.1  | 27.6±1.4  | 28.7±1.2  | 27.6±1.5  | 27.4±1.5               | 27.7±1.3               | 27.2±0.4               | 28.1±1.4               |
| HW/BW (mg/g)  | 5.10±0.06 | 5.16±0.03 | 5.08±0.09 | 5.06±0.07 | 6.78±0.03 <sup>A</sup> | 5.51±0.06 <sup>B</sup> | 5.21±0.02 <sup>B</sup> | 5.18±0.05 <sup>B</sup> |
| LW/BW(mg/g)   | 6.14±0.05 | 6.11±0.02 | 6.13±0.07 | 6.06±0.04 | 6.12±0.05              | 6.07±0.03              | 6.11±0.02              | 6.08±0.04              |
| SBP (mmHg)    | 106.0±3.3 | 107.4±5.3 | 108.0±6.7 | 106.0±1.7 | 134.2±2.6 <sup>A</sup> | 127.5±4.3 <sup>A</sup> | 129.8±3.7 <sup>A</sup> | 125.7±6.1 <sup>A</sup> |
| HR (bpm)      | 454±26    | 456±31    | 476±12    | 478±7     | 454±40                 | 469±19                 | 484±11                 | 475±14                 |
| LVEDD(mm)     | 3.53±0.05 | 3.46±0.03 | 3.51±0.01 | 3.42±0.06 | 4.09±0.02 <sup>A</sup> | 3.92±0.06              | 3.65±0.03 <sup>B</sup> | 3.66±0.04 <sup>B</sup> |
| LVESD(mm)     | 1.70±0.02 | 1.74±0.02 | 1.68±0.06 | 1.65±0.02 | 2.45±0.02 <sup>A</sup> | 1.97±0.03 <sup>B</sup> | 1.82±0.03 <sup>B</sup> | 1.70±0.03 <sup>B</sup> |
| IVSD(mm)      | 0.73±0.02 | 0.72±0.04 | 0.75±0.02 | 0.72±0.05 | 1.16±0.02 <sup>A</sup> | 0.89±0.04              | 0.78±0.05 <sup>B</sup> | 0.76±0.04 <sup>B</sup> |
| LVPWD (mm)    | 0.62±0.01 | 0.61±0.02 | 0.57±0.02 | 0.66±0.03 | 1.07±0.02 <sup>A</sup> | 0.81±0.07              | 0.68±0.04 <sup>B</sup> | 0.62±0.03 <sup>B</sup> |
| FS (%)        | 56.6±3.2  | 54.4±4.1  | 53.0±2.1  | 55.2±1.2  | 34.2±1.8 <sup>A</sup>  | 44.6±1.0 <sup>AB</sup> | 52.7±1.4 <sup>B</sup>  | 54.3±0.8 <sup>B</sup>  |

BW, body weight; HW, heart weight; SBP, systolic blood pressure; HR, heart rate; LVEDD, left ventricular end-diastolic diameter; LVESD, left ventricular end-systolic diameter; IVSD, left ventricular septum, diastolic; LVPWD, left ventricular posterior wall, diastolic; FS, fractional shortening. All values are mean ± SEM. <sup>A</sup>*P*<0.05 aortic banding versus sham-operation; <sup>B</sup>*P*<0.05 Curcumin treatment versus Vehicle treatment after aortic banding.

# Li et al., Supplemental Figure. 1

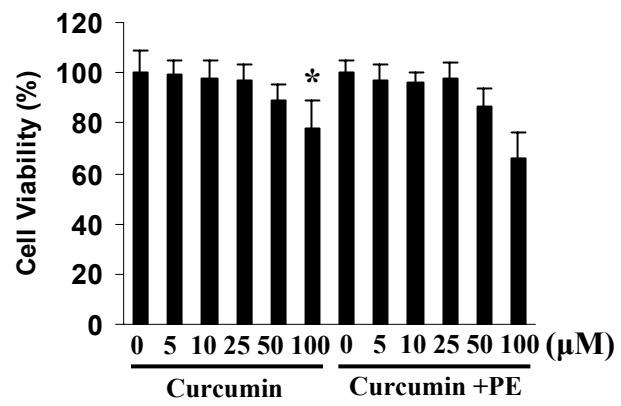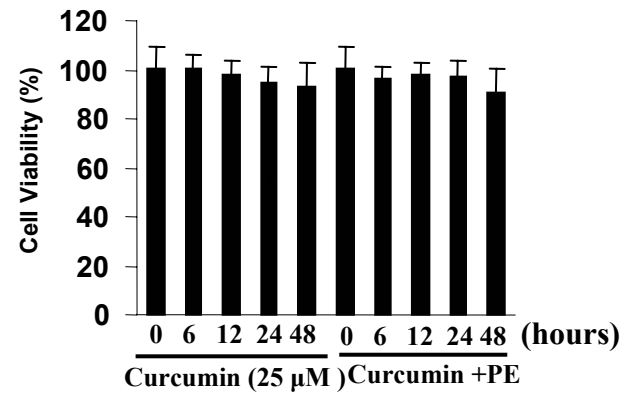

## Li et al., Supplemental Figure. 2

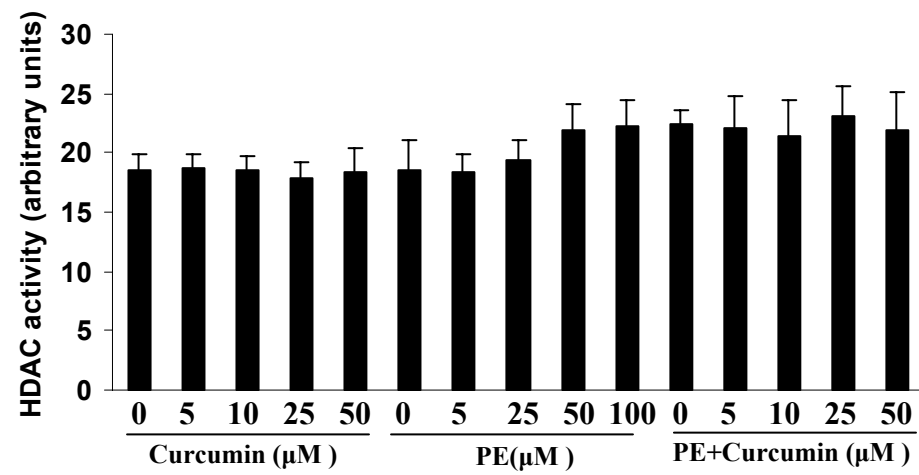

Li et al., Supplemental Figure. 3

**A**

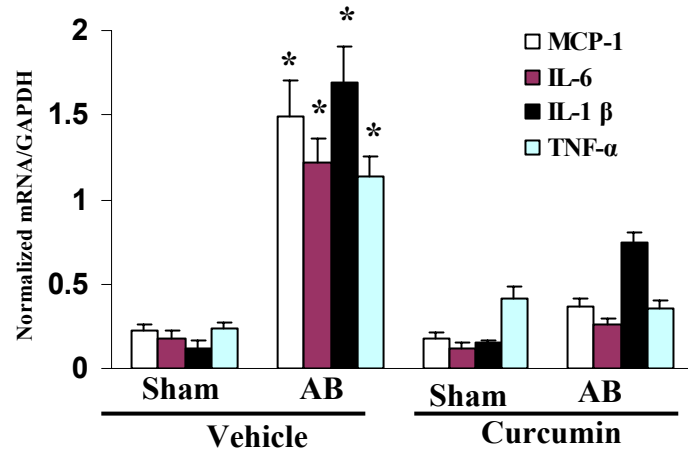

**B**

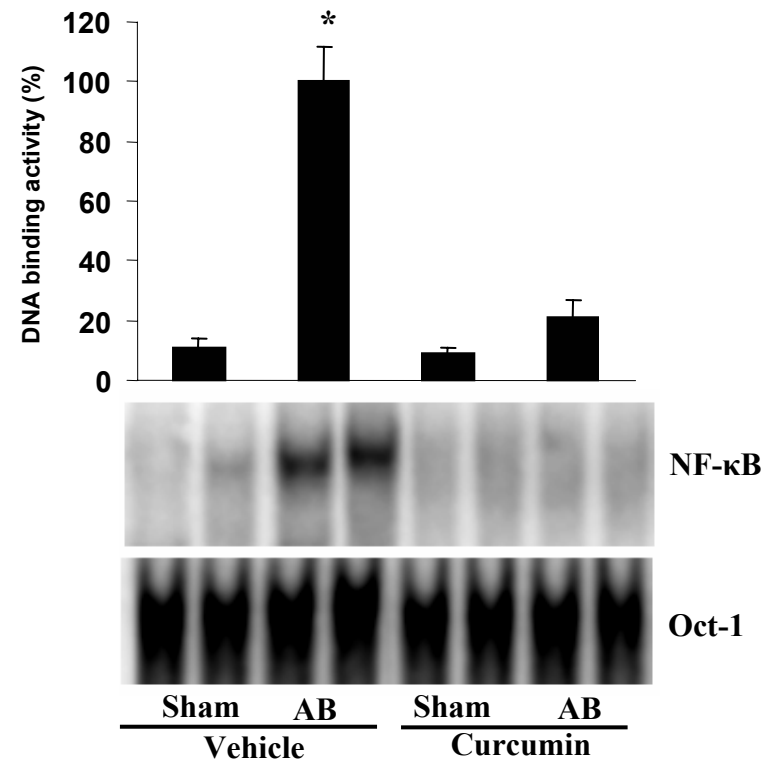

**C**

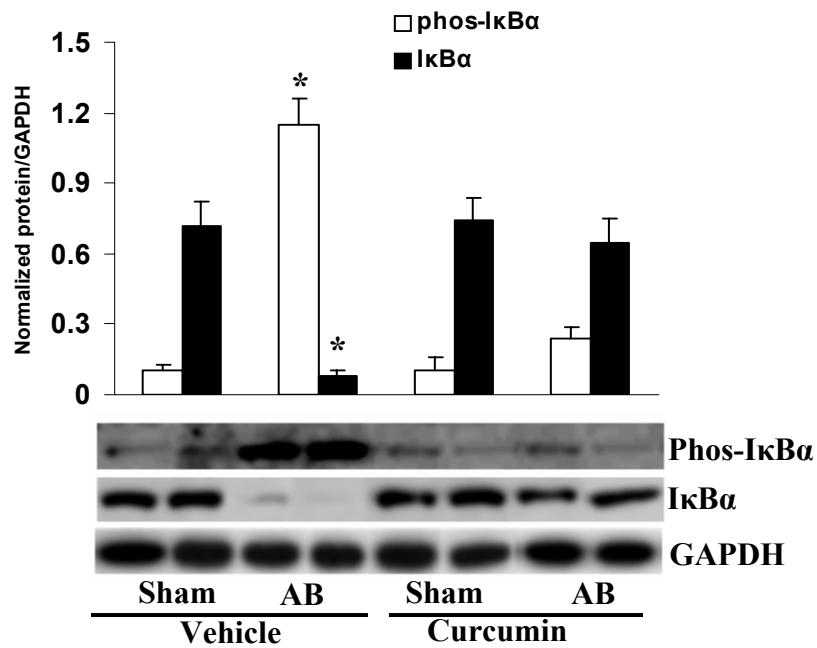

**D**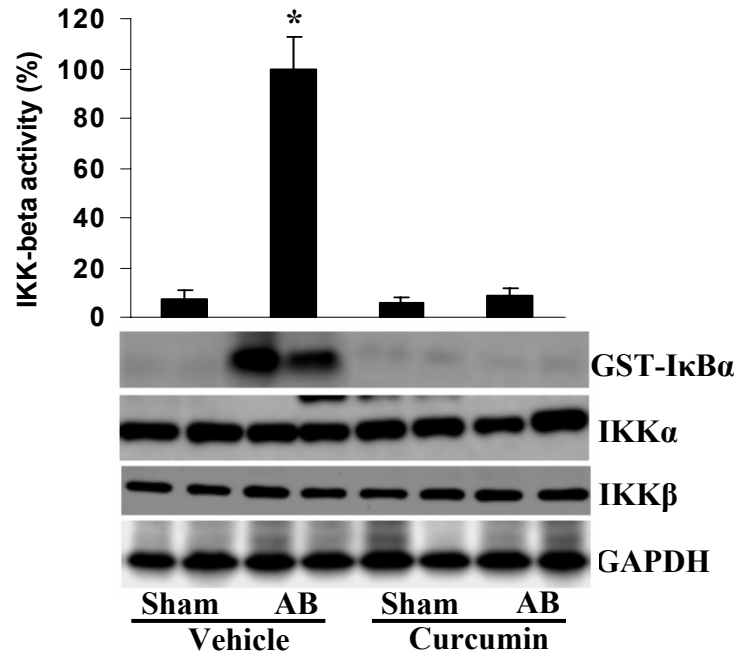**E**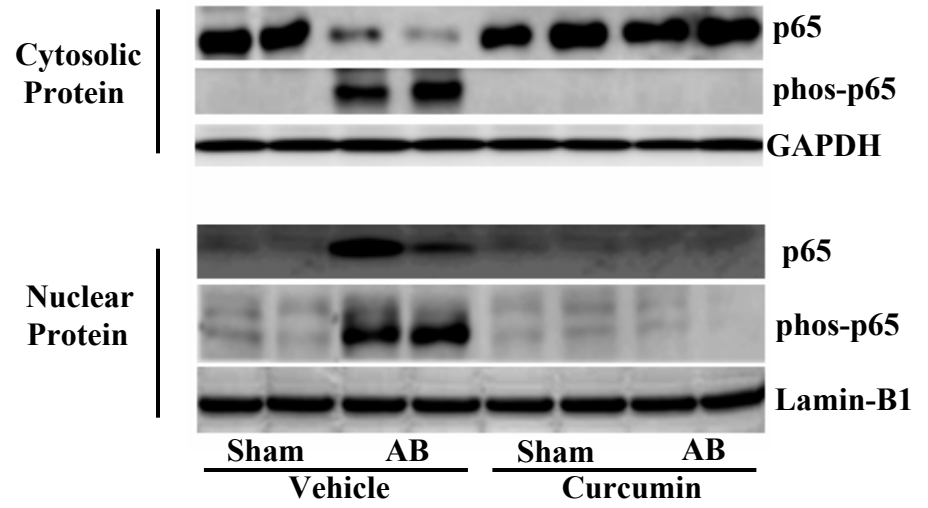

**F**

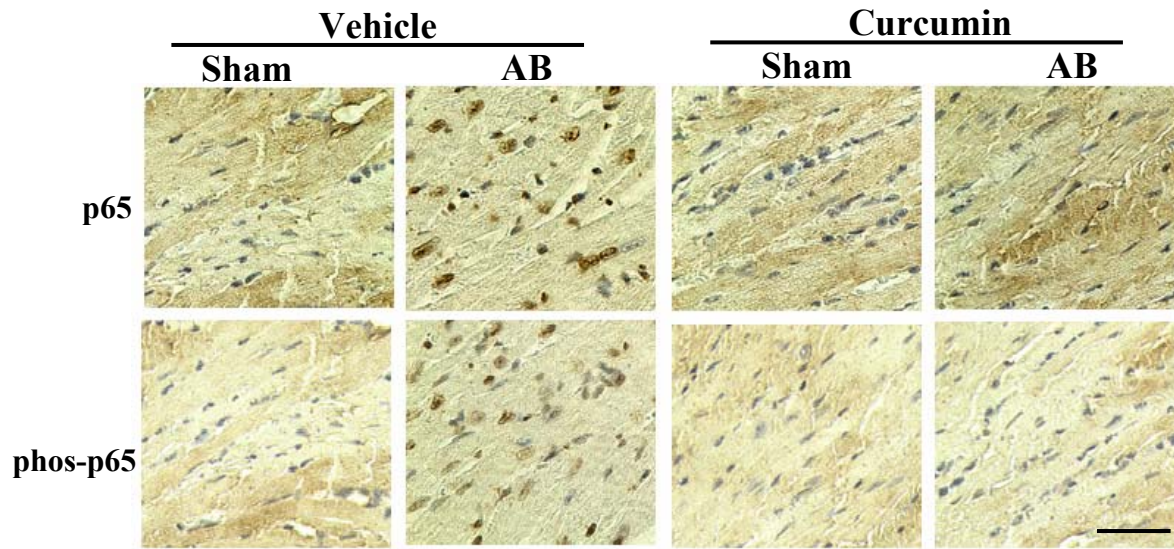

**G**

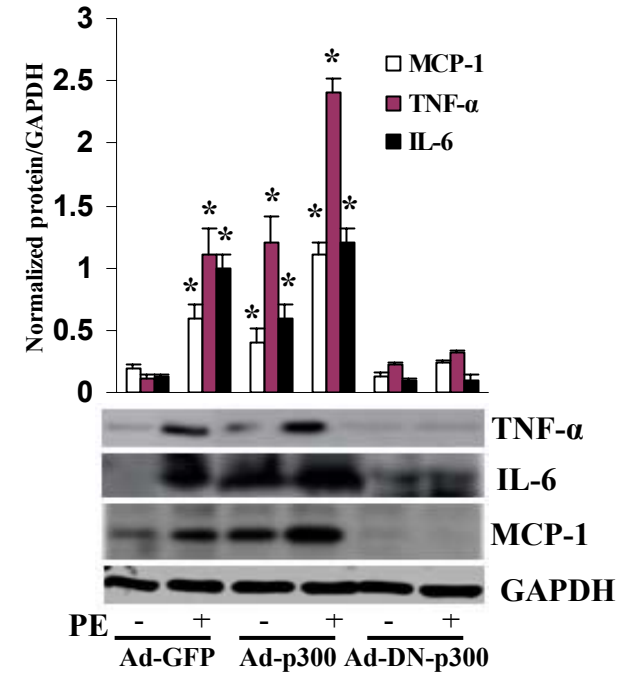

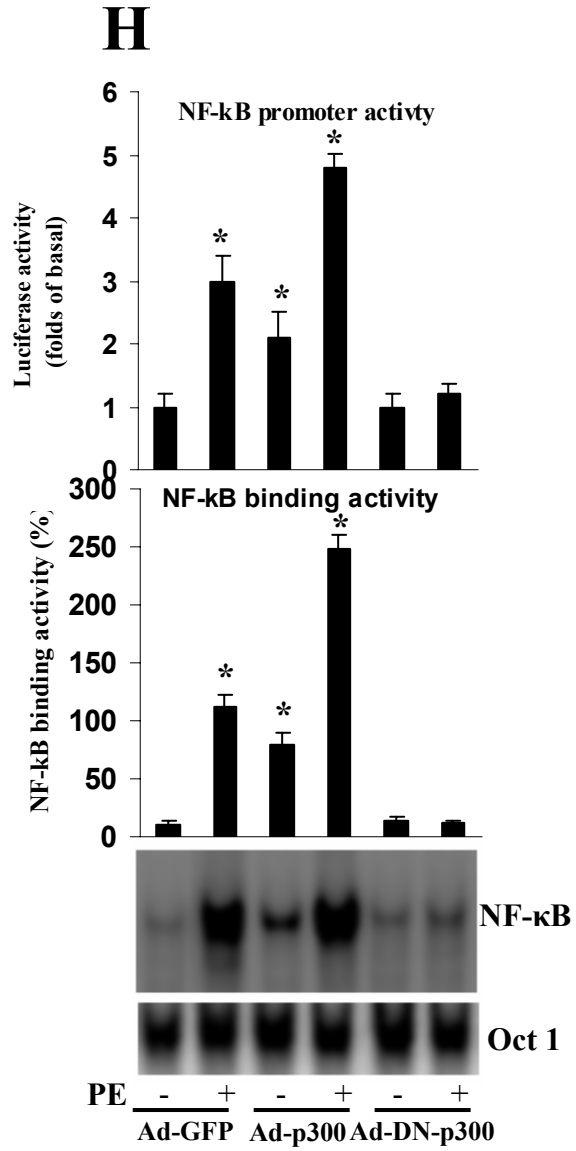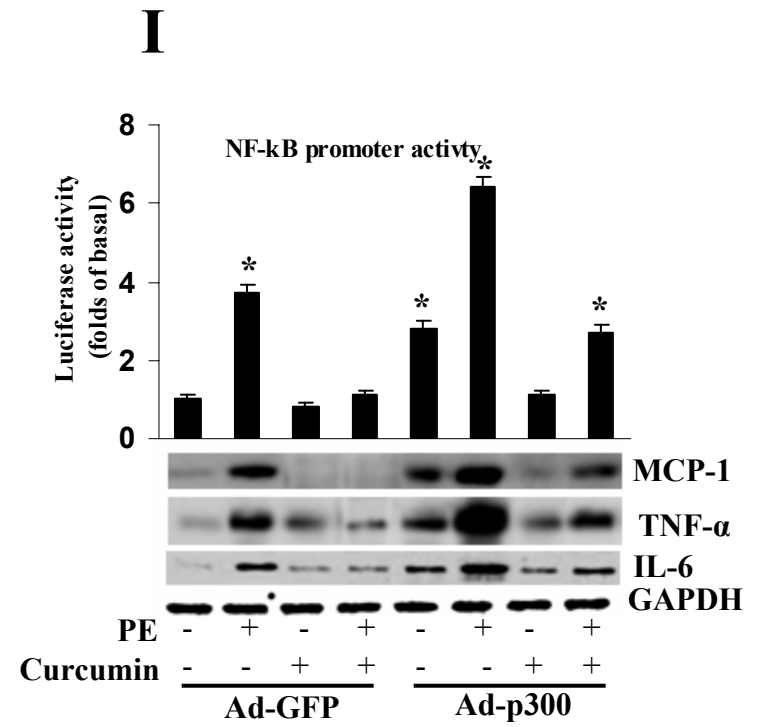

Li et al., Supplemental Figure. 4

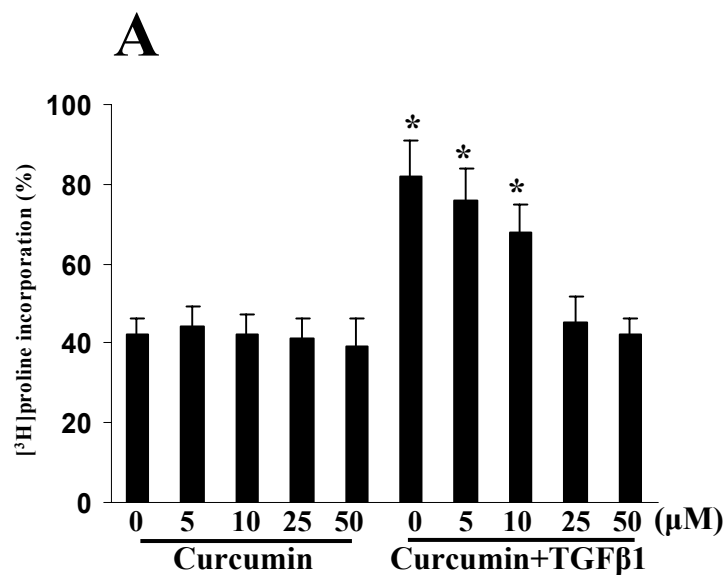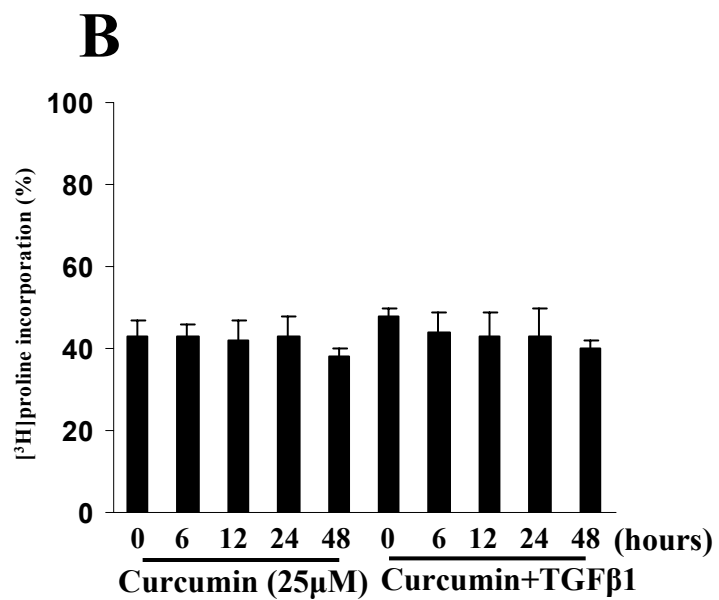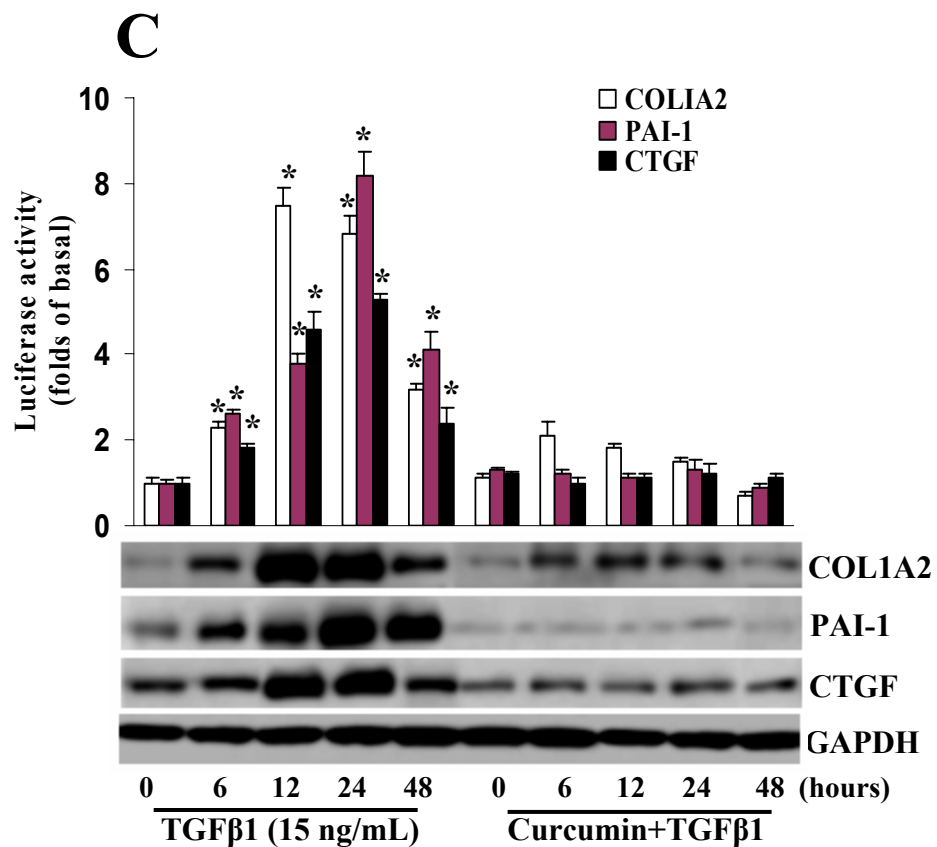



**D**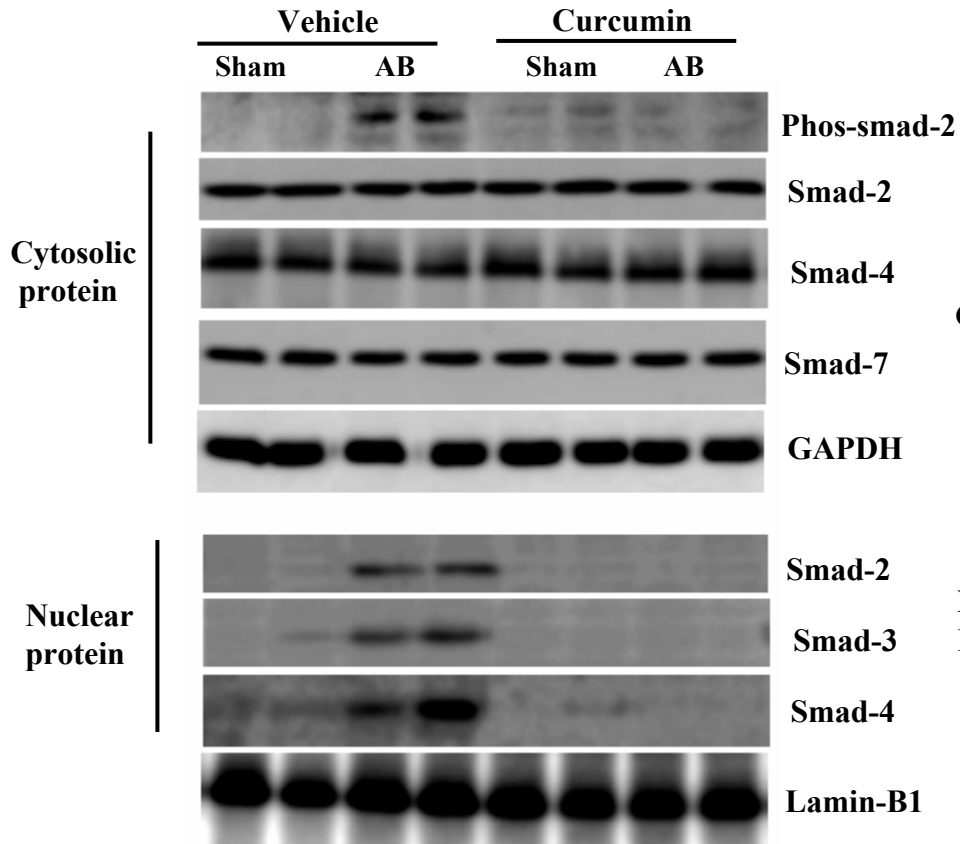**E**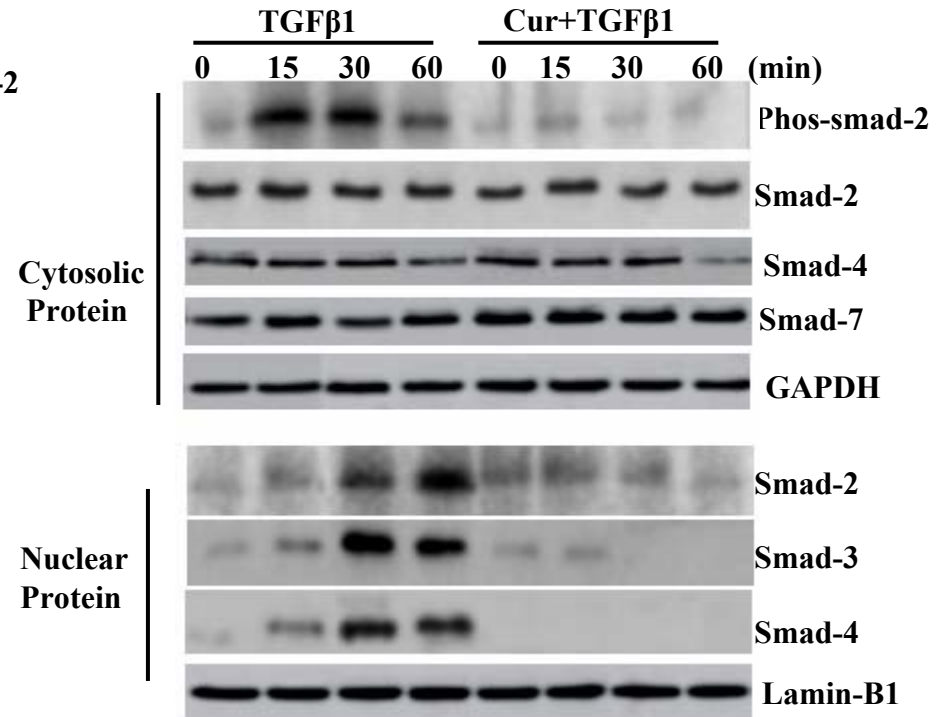

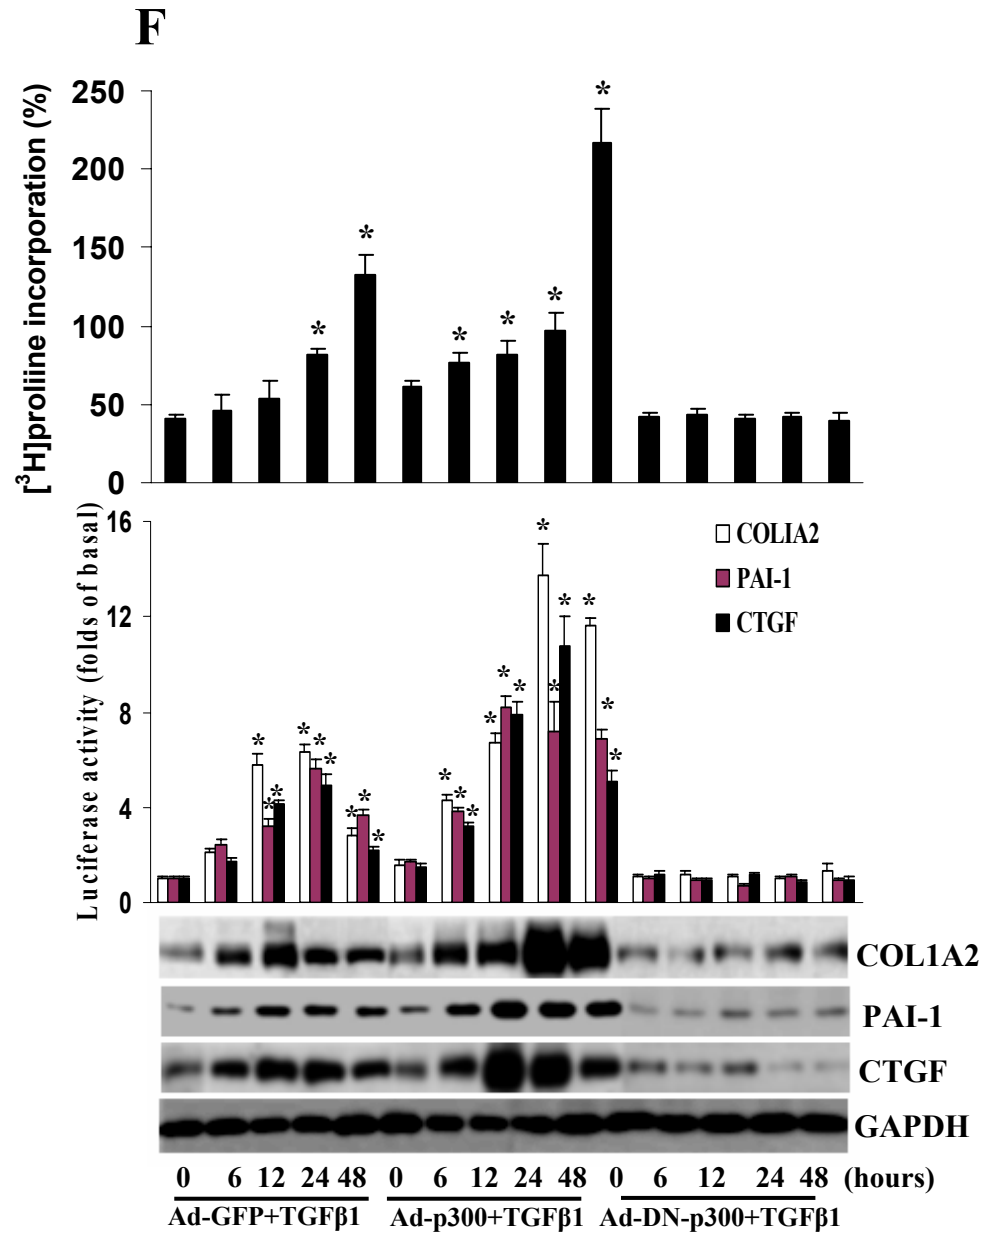

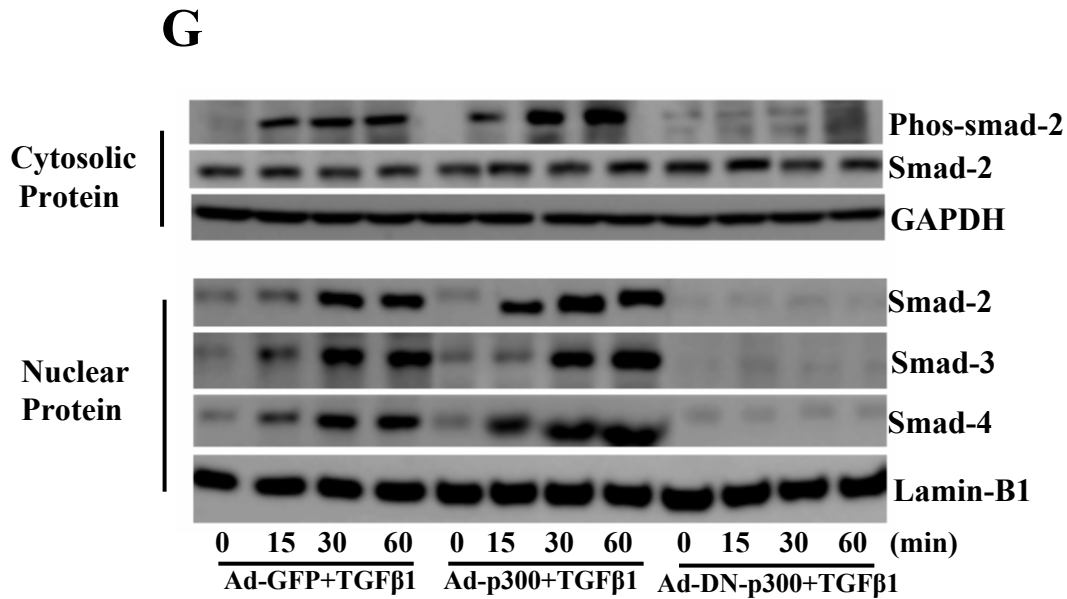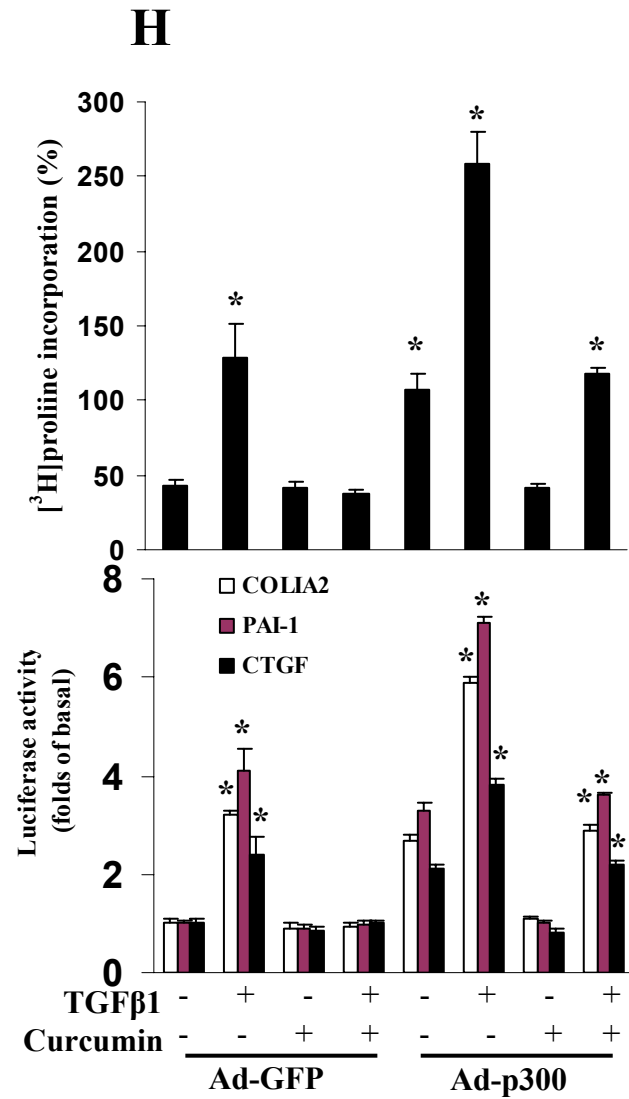

# I

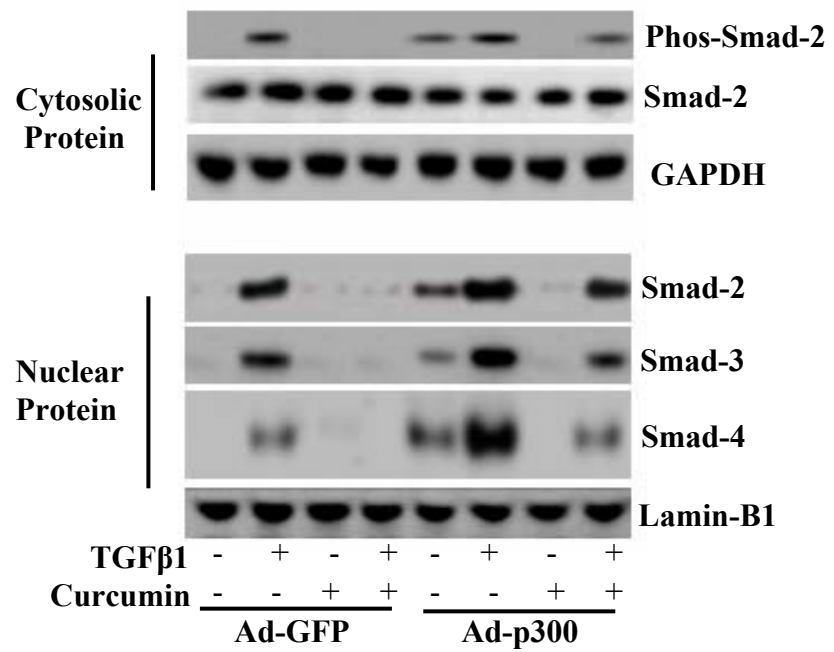

Li et al., Supplemental Figure. 5

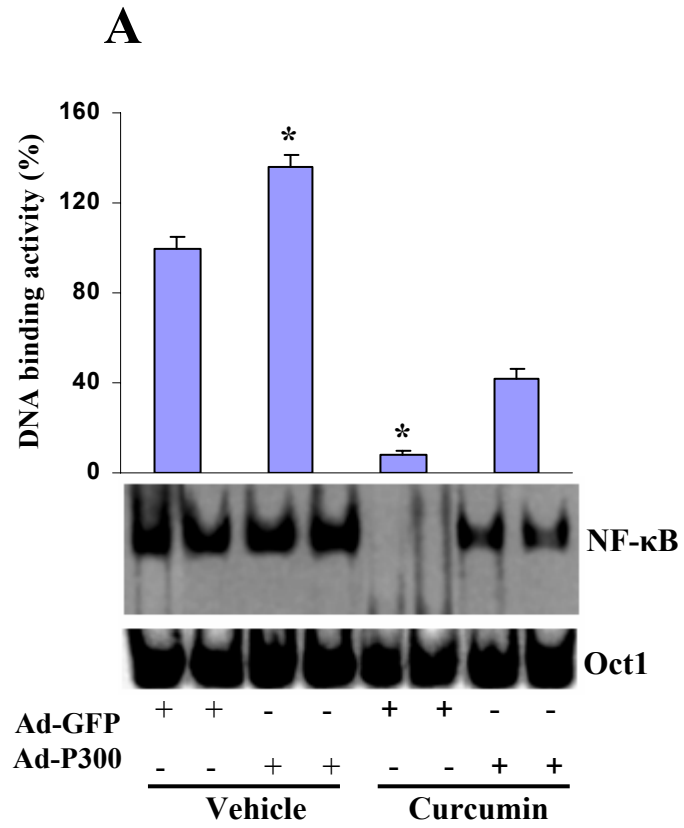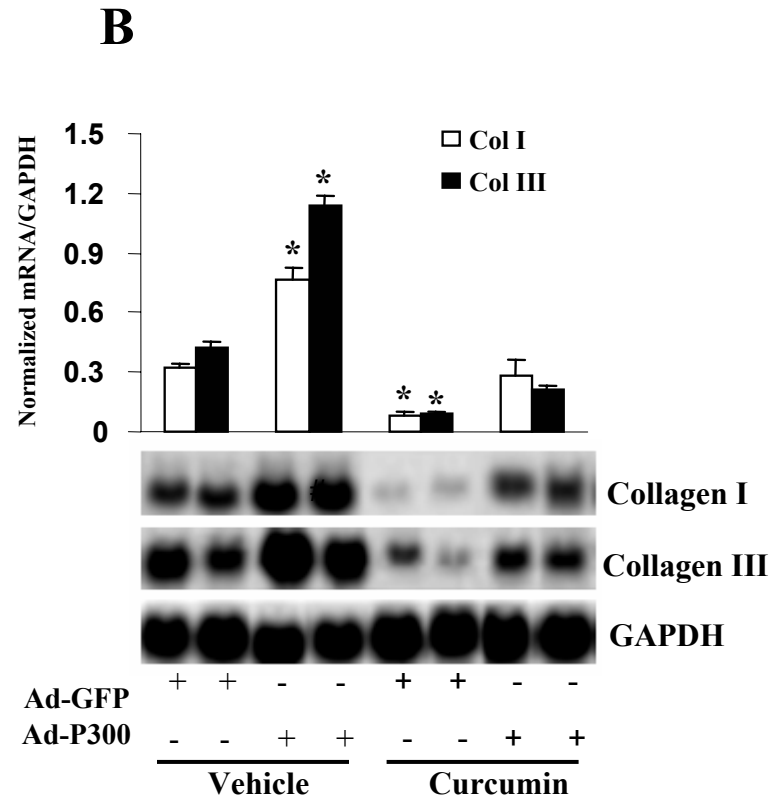

## **Supplemental Figure Legend**

### **Supplemental Figure 1**

Effect of curcumin and/or PE on cell viability in cardiac myocyte. The results were reproducible in three separate experiments. \* $P < 0.05$  vs. exposed to control.

### **Supplemental Figure 2**

(A) Effect of curcumin and/or PE on the in vitro activity of HDAC. HDAC activity in the pellet was assayed and reported as arbitrary units as described in *Methods*. (B) Effect of p300 on the inhibitory effect of curcumin on cardiac hypertrophy. Cells were treated with or without 25  $\mu\text{M}$  curcumin for 60 minutes and then incubated with 100  $\mu\text{M}$  PE for 48 hours. [ $^3\text{H}$ ]leucine incorporation, luciferase activity and Northern blot were described in *Materials and Methods*. Each assay was performed at least three times. \* $P < 0.05$  vs. exposed to control.

### **Supplemental Figure 3**

(A) Real Time-PCR analysis of TNF- $\alpha$ , IL-1 $\beta$ , IL-6 and MCP-1 mRNA expression in the myocardium obtained from indicated groups (n=6). Each assay was performed in triplicate. \* $P < 0.05$  for difference from vehicle/sham values. (B) EMSA for NF- $\kappa\text{B}$  activity in the myocardium from 4 groups of animals (n=5). Top, optical density in region of NF- $\kappa\text{B}$  was quantified with PhosphorImager system. Bottom, representative bands. Oct-1 binding activity was used as a control for EMSA assay. (C) Western blot analysis of I $\kappa\text{B}\alpha$  degradation and phosphorylation of the myocardium was obtained from indicated animals (n=5). Top, quantitative results. Bottom, representative blots. (D) IKK activity (n=3). Top, quantitative results. Bottom, the extracts were assayed for IKK by the immunocomplex kinase assay (upper panel) and for IKK- $\alpha$  (middle panel) and IKK- $\beta$  (lower panel) protein expression by Western blot analysis as described in *Materials and Methods*. (E) Curcumin inhibited p65 phosphorylation and translocation induced by AB (n=3). Western blot analysis of p65 and phosphorylated p65 in the cytosolic and nuclear fractions of the myocardial cell obtained from each respective group. Anti-lamin B1 and anti-GAPDH were used as the loading controls for nuclear protein and cytosolic protein content, respectively. (F) Tissue sections from each group were immunostained with anti-

p65 or anti-phosphorylated p65 antibodies (n=4; Scale bar: 20  $\mu$ m). From A to F, each assay was performed in triplicate. \* $P$ <0.05 for difference from vehicle/sham values. **(G and H)** Effect of p300 on TNF- $\alpha$ , IL-6 and MCP-1 protein expression (G) and NF- $\kappa$ B activation (H) induced by PE. Cells were infected with Ad-p300, Ad-DN-p300 or Ad-GFP for 24 hours, and then treated with 100  $\mu$ M PE for 36 hours for cytokines or for 24 hours for NF- $\kappa$ B activation. **(I)** P300 significantly reversed the inhibitory effect of curcumin on the NF- $\kappa$ B transcriptional activity and cytokines protein expression induced by PE. Cells were infected with Ad-p300 or Ad-GFP for 24 hours, treated with 25  $\mu$ M curcumin for 60 minutes, and then incubated with 100  $\mu$ M PE for 24 hours. Luciferase activity and Western blot were performed as described in *Materials and Methods*. From G to I, the results were reproducible in three separate experiments. \* $P$ <0.05 vs. exposed to Ad-GFP infection alone group.

#### **Supplemental Figure 4**

**(A and B)** The dose and time course of curcumin on TGF- $\beta$ 1-induced [ $^3$ H] proline incorporation is depicted in these graphs. In these experiments cells were pretreated with either different doses of curcumin, or with 25 $\mu$ M curcumin, for 60 minutes and then incubated with either 15 ng/ml of TGF- $\beta$ 1 for 48 hours, or with curcumin for up to 48 hours, respectively. Each assay was performed in triplicate. \* $P$ <0.05 compared to control group. **(C)** Curcumin was shown to inhibit the promoter activities and protein expression of COL1A2, PAI-1 and CTGF. Luciferase assay and Western blot analysis were performed as described in *Materials and Methods*. **(D)** Immunoblot analysis of Smad-2 phosphorylation and Smad 2/4/7 expression in the cytosol along with Smad-2/4/7 expression in the nucleus from each group 8 weeks after AB (n=3). \* $P$ <0.05 was obtained for the vehicle/sham values. **(E)** Curcumin blocked Smad-2 phosphorylation and Smad-2/3/4 translocation induced by TGF- $\beta$ 1 in cardiac fibroblasts. **(F)** The effect of p300 on collagen synthesis along with promoter activities and protein expression of COL1A2, PAI-1 and CTGF. Cells were infected with or without Ad-p300, Ad-DN-p300 or Ad-GFP for 24 hours and then incubated with 15 ng/ml TGF- $\beta$ 1 for up to 48 hours. Luciferase activity and Western blot were performed as described in *Materials and Methods*. **(G)** The effect of p300 on Smad-2 phosphorylation and Smad-2/3/4 translocation. **(H and I)** P300 significantly reversed the inhibitory effects of curcumin on collagen synthesis, promoter activities of COL1A2, PAI-1 and CTGF as well as Smad-2 phosphorylation and Smad-2/3/4 translocation. Cells were infected with Ad-p300 or Ad-GFP for 24 hours, treated with 25  $\mu$ M curcumin for 60 minutes, and then

incubated with 15 ng/ml TGF- $\beta$ 1 for either 36 hours to observe [ $^3$ H] proline incorporation and promoter activity (H) or 60 minutes to observe Smad-2 phosphorylation and Smad-2/3/4 translocation (I). Each assay was performed in triplicate. \* $P$ <0.05 compared to Ad-GFP infection alone.

### **Supplemental Figure 5**

(A) Top, quantitative results from EMSA analysis for NF- $\kappa$ B; Bottom, representative bands of NF- $\kappa$ B obtained through EMSA; (B) Analysis of Collagen I and III mRNA expression level in each group (n=5). Top, quantitative analysis, Bottom, representative Northern blots. Each assay was performed in triplicate. \* $P$ <0.05 compared to vehicle/Ad-GFP values.
